# Supplementary material for: Glycine and N‐acetylcysteine (GlyNAC) supplementation in older adults improves glutathione deficiency, oxidative stress, mitochondrial dysfunction, inflammation, insulin resistance, endothelial dysfunction, genotoxicity, muscle strength, and cognition: Results of a pilot clinical trial
Source: PubMed Central journal article supplement (PMC8002905; doi:10.1002/ctm2.372), 2021-03-27
Supplement: CTM2-11-e372-s001.pdf [file CTM2-11-e372-s001.pdf]

Older Adults

Impact of supplementing Glycine and N-acetylcysteine (GlyNAC)

| Oxidative Stress                                  | Mitochondrial Fuel Oxidation | Inflammation                                   | Insulin Resistance                                  | Endothelial Function                 | Genomic toxicity | Physical Function                                          | Cognition                                                                |
|---------------------------------------------------|------------------------------|------------------------------------------------|-----------------------------------------------------|--------------------------------------|------------------|------------------------------------------------------------|--------------------------------------------------------------------------|
| Glutathione ↑<br>TBARS ↓<br>F2-iso<br>prostanes ↓ | RQ ↓<br>MFO ↑<br>MGO ↓       | IL-6 ↓<br>TNF $\alpha$ ↓<br>hsCRP ↓<br>IL-10 ↑ | Fasting glucose ↓<br>Fasting insulin ↓<br>HOMA-IR ↓ | sICAM1 ↓<br>sVCAM1 ↓<br>E-Selectin ↓ | 8-OHdG ↓         | Gait Speed ↑<br>6-Minute<br>walk test ↑<br>Grip Strength ↑ | MoCA ↑<br>Trails tests ↓<br>Verbal<br>fluency test ↑<br>DSST ↑<br>BDNF ↑ |
